# Supplementary material
Source: PubMed Central journal article supplement (PMC4222627)
Supplement: ac5029837_si_001.pdf [file ac5029837_si_001.pdf]

# Supporting Information

## Dielectrophoretic monitoring and inter-strain separation of intact *Clostridium difficile* based on their S (Surface)-layers

Yi-Hsuan Su<sup>1</sup>, Cirle Warren<sup>2</sup>, Richard L. Guerrant<sup>2</sup> and Nathan S. Swami<sup>1,\*</sup>

1 – Electrical and Computer Engineering, University of Virginia

2 – Infectious Diseases, School of Medicine, University of Virginia

### Table of Contents:

**Table S1:** Viability of *C. difficile* after 3 hours in microfluidic device.

**Supplementary Figure S1:** Representative measurements of cell wall thickness from TEM images of HTCD and NTCD strains.

**Supplementary Movie 1:** Dielectrophoretic separation (400 kHz) of the HTCD strain versus the NTCD strain from mixed samples.

**Supplementary Movie 2:** Positive Dielectrophoretic response (400 kHz) of pure HTCD strain sample, as control.

**Supplementary Movie 3:** Dielectrophoretic separation (400 kHz) of viable versus deactivated HTCD after vancomycin treatment (20 min).

**Supplementary Movie 4:** Negative Dielectrophoretic response (400 kHz) of vancomycin treated HTCD sample (4 hours) as control.

\* Corresponding Author. Fax: +1-434-924-8818.

Email: nswami@virginia.edu

**Viability Measurement:** *C.difficile* is an anaerobic microbe, which is poisoned by oxygen upon exposure to the atmosphere or dissolved oxygen in the fluid. The following results from the viability test (**Table S1**), performed by Colony-Forming Unit assay, is used to confirm that all three strains used herein can survive up to 3 hours under the aerobic conditions of the microfluidic electrode-less DEP device, with occasional AC field ( $<300 V_{pp}/cm$  in the 0.1-5 MHz range swept over 5 minutes), as per the following viability count (“+” represents more than 10 Colony Forming Units) results.

|               | HTCD | LTCD | NTCD |
|---------------|------|------|------|
| <b>0 hour</b> | +    | +    | +    |
| <b>1 hour</b> | +    | +    | +    |
| <b>2 hour</b> | +    | +    | +    |
| <b>3 hour</b> | +    | +    | +    |
| <b>4 hour</b> | -    | -    | -    |

### Cell wall thickness measurement

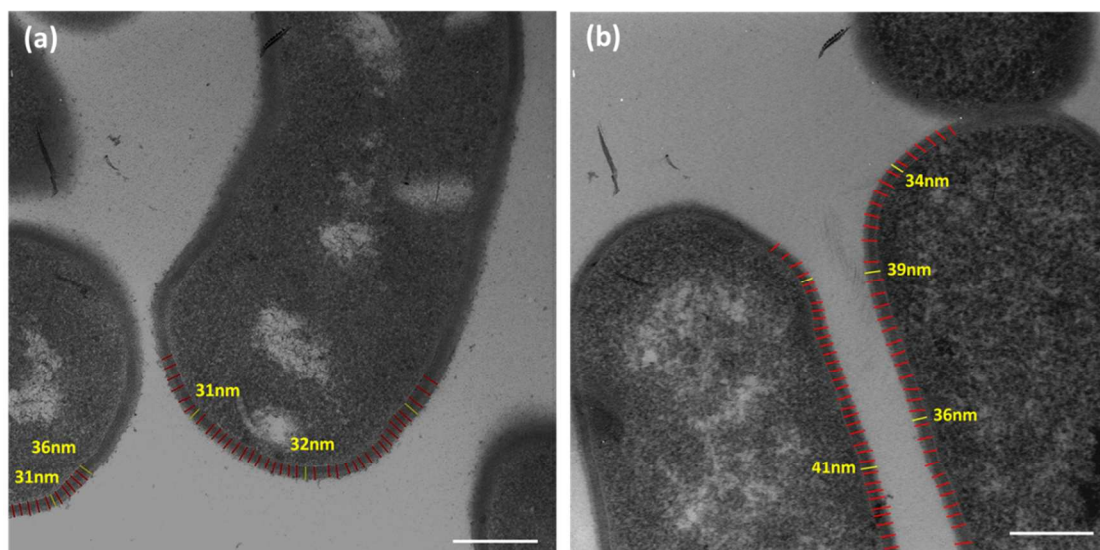

**Supplementary Figure S1:** Representative measurements of cell wall thickness from images of: (a) HTCD with an average of  $33.2 \pm 4.1$  nm; and (b) NTCD with an average of  $36.9 \pm 4.3$  nm. The thickness measurement for each cell is indicated at various points (approximately 1 point over every 30nm length). Note the out-of-focus regions are not analyzed in order to avoid any ambiguity in the measurements. Scale bar: 200 nm

**Supplementary Movie 1:** Dielectrophoretic separation of the HTCD strain versus the NTCD strain from mixed samples at 400 kHz, wherein HTCD shows pDEP and NTCD shows nDEP. All movies are time-lapse recordings with 10 frame per second with time stamp in min:sec. Video speed: 20 frame per second (fps)

**Supplementary Movie 2:** Positive Dielectrophoretic response of pure HTCD strain sample at 400 kHz as control.

**Supplementary Movie 3:** Dielectrophoretic separation at 400 kHz of viable versus deactivated HTCD after vancomycin treatment for 20 minutes. At early vancomycin treatment times, the heterogeneous sample has a subpopulation of viable HTCD that shows pDEP versus a majority population of deactivated HTCD that shows nDEP.

**Supplementary Movie 4:** Negative Dielectrophoretic response of fully vancomycin treated HTCD strain sample (4 hours treatment) at 400 kHz as control.
